# Supplementary material
Source: Springer Nature journal article supplement (https://www.springermedizin.de/resource/supplementary/11689_2014_107_MOESM2_ESM.pdf/9673230)

**a) Grand-averaged waveforms from LRC infants (n=45)**

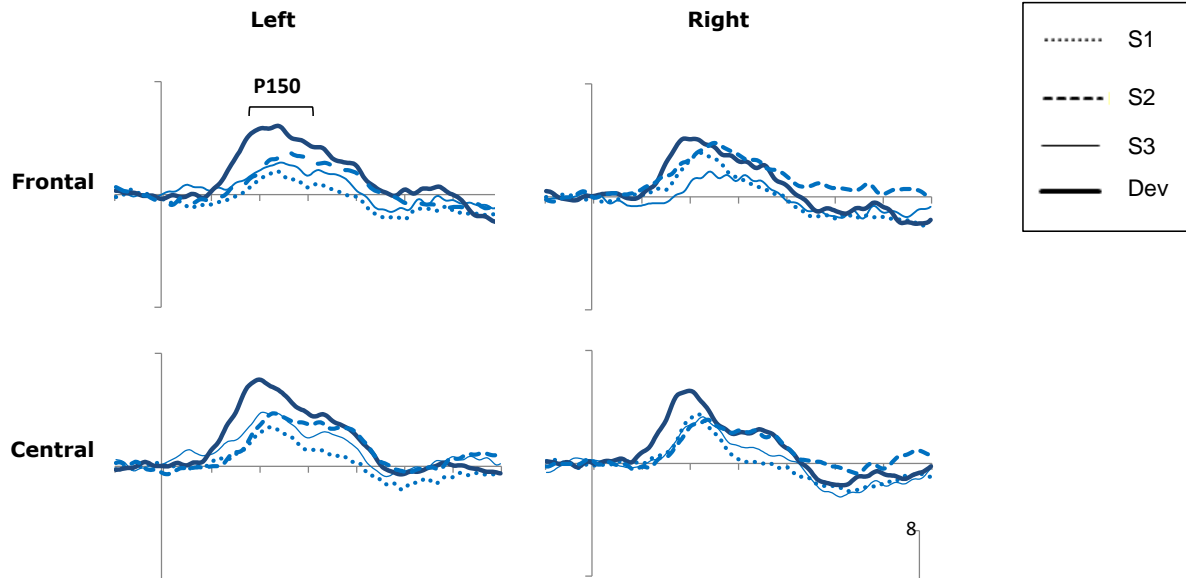

**b) Grand-averaged waveforms from HRA infants (n=35)**

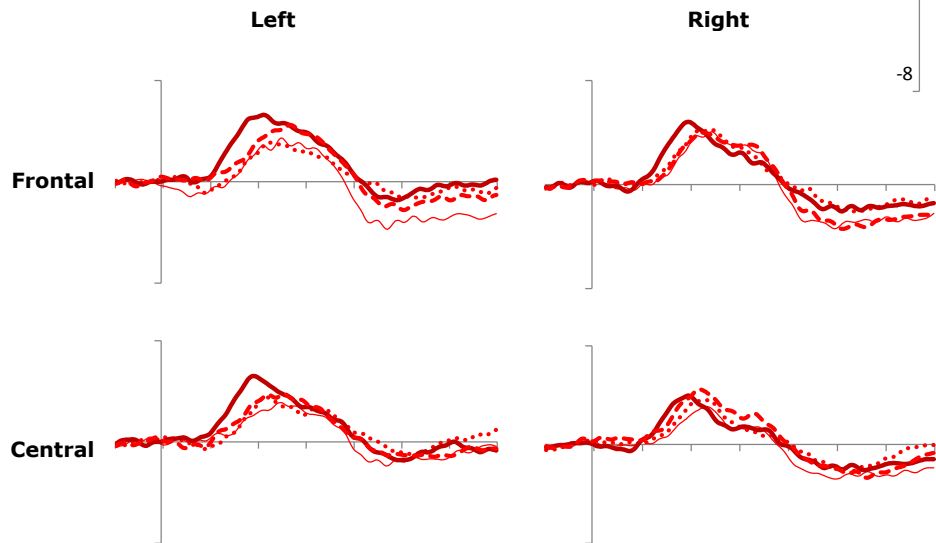

Supplement: MOESM2 [file 9673230]
